# Supplementary material for: Strain-selected magnetic ordering in 1T′α-CrXY (X, Y = S, Se, Te) monolayers
Source: Royal Society of Chemistry journal article supplement (doi:10.1039/d5cp03532e), 2025-12-11
Supplement: d5cp03532e1.pdf [file d5cp03532e1.pdf]

## Supplementary information:

### Strain-selected magnetic ordering in 1T' $\alpha$ -CrXY (X, Y = S, Se, Te) monolayers

Deju Zhang<sup>a,b</sup> and Yanning Zhang<sup>a,b,\*</sup>

<sup>a</sup> Institute of Fundamental and Frontier Sciences, University of Electronic Science and Technology of China, Chengdu 611731, People's Republic of China

<sup>b</sup> Key Laboratory of Quantum Physics and Photonic Quantum Information (University of Electronic Science and Technology of China), Ministry of Education, Chengdu 611731, People's Republic of China

\*yanningz@uestc.edu.cn

**Table. S1** The calculated lattice parameters ( $a$  and  $b$ ), nearest Cr-Cr distances ( $d_1$ ,  $d_2$  and  $d_3$ ), and Wyckoff sites of 1T' $\alpha$ -CrTeSe monolayer.

| Lattice parameters (Å) | Nearest distances (Å) | Wyckoff sites              |
|------------------------|-----------------------|----------------------------|
| $a = 6.642$            | $d_1 = 3.979$         | Cr $2e(0.728, 1/4, 0.498)$ |
| $b = 3.352$            | $d_2 = 3.352$         | Te $2e(0.064, 1/4, 0.440)$ |
|                        | $d_3 = 3.470$         | Se $2e(0.430, 1/4, 0.552)$ |

**Table. S2** The calculated energies of four magnetic configurations (FM, sAFM, dAFM, zAFM) of 1T' $\alpha$ -CrTeSe monolayer, in which all values are referenced to the FM configuration.

| sAFM (meV) | dAFM (meV) | zAFM (meV) |
|------------|------------|------------|
| 515.1      | 188.6      | 65.6       |

**Table. S3** The calculated MAEs of the strain-free 1T' $\alpha$ -CrTeSe monolayer along the  $x$  ( $x'$ ),  $y$  ( $y'$ ), and  $z$  ( $z'$ ) axes, in which all values are referenced to  $x$  ( $x'$ ) axis.

| $E_y$ ( $\mu$ eV) | $E_z$ ( $\mu$ eV) | $E_{y'}$ ( $\mu$ eV) | $E_{z'}$ ( $\mu$ eV) |
|-------------------|-------------------|----------------------|----------------------|
| 1348              | 161               | 1708                 | 504                  |

**Table. S4** The calculated MAEs of the 1T' $\alpha$ -CrTeSe monolayer under strains along the  $x$ ,  $y$ , and  $z$  axes, in which all values are referenced to  $x$  axis.

| $\varepsilon$ (%) | $E_y$ ( $\mu$ eV) | $E_z$ ( $\mu$ eV) |
|-------------------|-------------------|-------------------|
| -6                | -735              | -1008             |
| -2                | 585               | -159              |
| -1                | 1352              | -433              |
| 1                 | 1285              | 77                |
| 0.2               | 1213              | -188              |
| 0.4               | 1327              | -57               |
| 0.6               | 1167              | -212              |
| 0.8               | 1202              | 32                |
| 2                 | 979               | -120              |
| 6                 | 1029              | 917               |

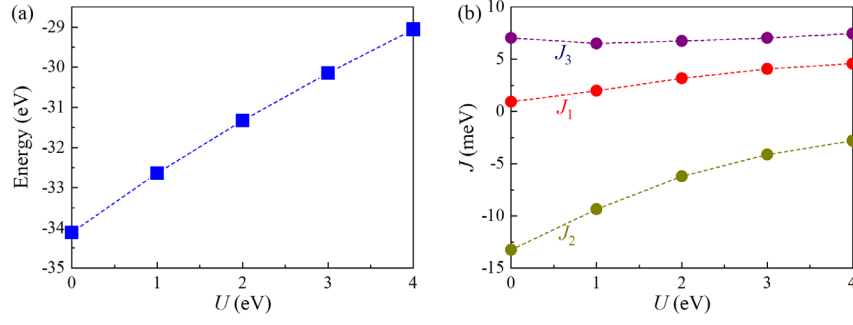

**Fig. S1** The calculated (a) total energy and (b) exchange parameters ( $J$ ) of 1T' $\alpha$ -CrTeSe monolayer as functions of  $U$  values.

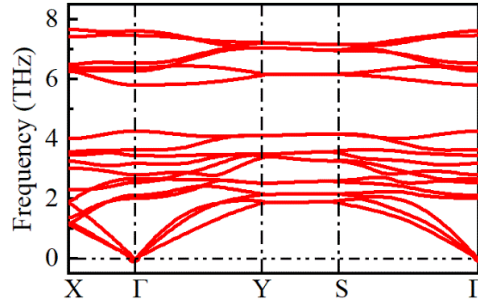

**FIG. S2** Phonon spectrum of 1T' $\alpha$ -CrTeSe monolayer along the high-symmetric  $k$  points in Brillouin zone.

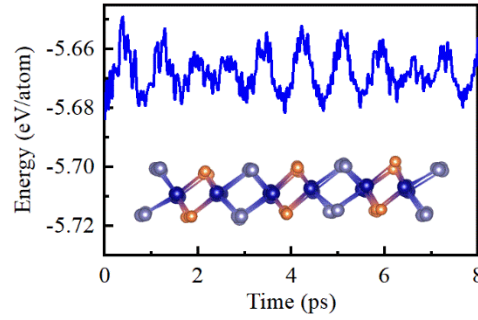

**FIG. S3** AIMD simulation of 1T' $\alpha$ -CrTeSe monolayer at 300 K up to 8 ps. The final snapshots of these monolayers are inset.

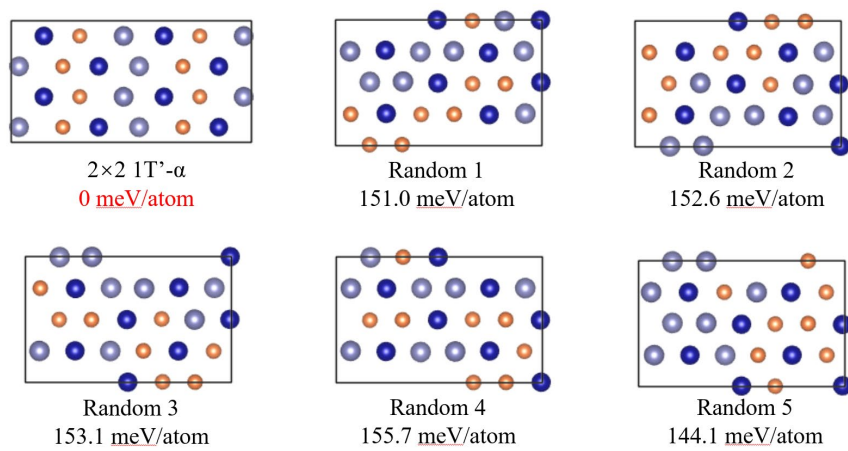

**FIG. S4** The optimized structures of 1T' $\alpha$ -CrTeSe monolayer and several random patterns. The energies relative to 1T' $\alpha$  phase are inset.

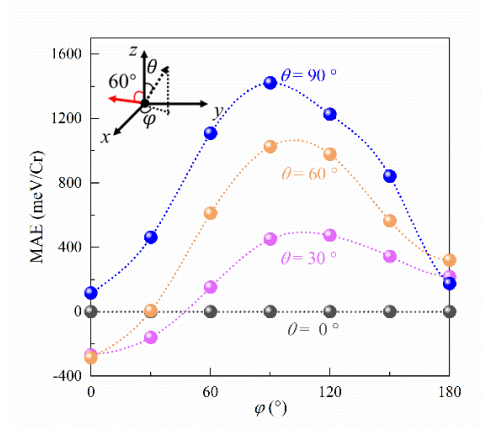

**FIG. S5** MAEs of 1T' $\alpha$ -CrTeSe monolayer with the spin moments parallelly oriented along different directions. The spin rotation angle ( $\theta/\varphi$ ) of 0 is along the  $z/x$  axis.

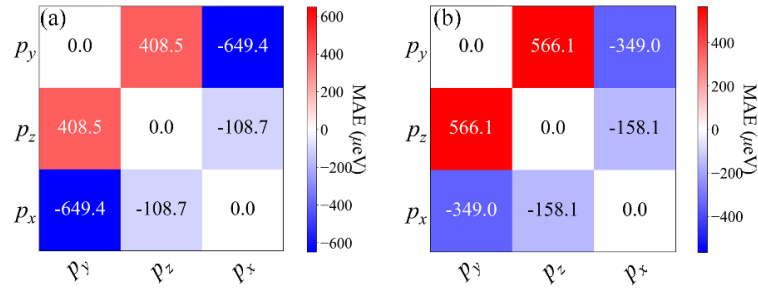

**FIG. S6** Orbital-resolved MAEs of 1T' $\alpha$ -CrTeSe monolayer.

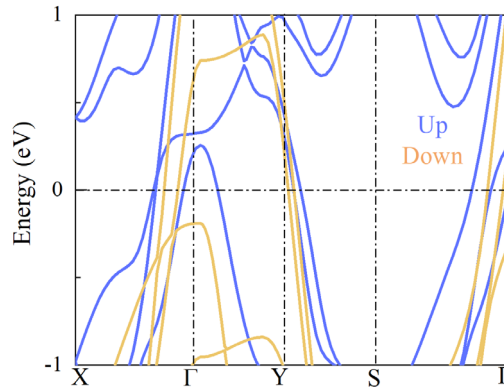

**Fig. S7** Spin-polarization band structures of 1T' $\alpha$ -CrTeSe monolayer, in which the blue and yellow lines represent the spin-up and spin-down states, respectively.

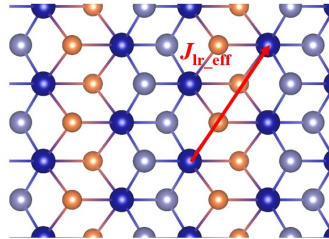

**Fig. S8** Sketch of the effective long-range exchange parameter ( $J_{lr\_eff}$ ) in 1T' $\alpha$ -CrTeSe monolayer.

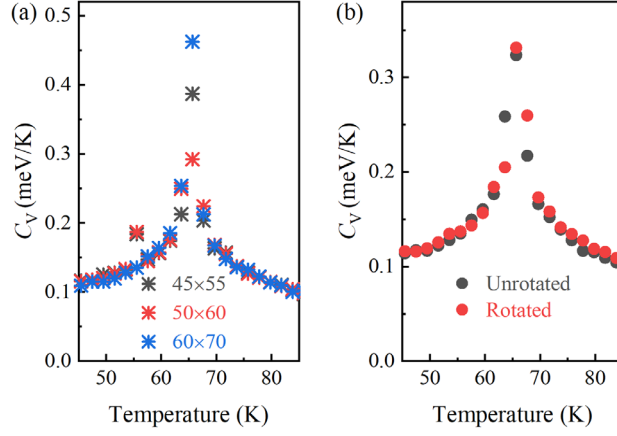

**FIG. S9** MC simulations of the specific heats of 1T'α-CrTeSe monolayer by using (a) different supercells and (b) MAEs as functions of temperatures.

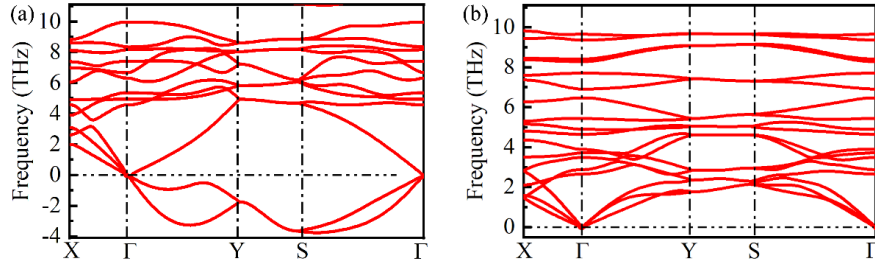

**FIG. S10** Phonon spectra of (a) 1T'α-CrSO and (b) 1T'α-CrSeS monolayers along the high-symmetric  $k$  points in Brillouin zone.

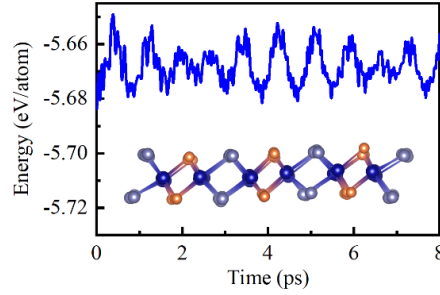

**FIG. S11** AIMD simulation of 1T'α-CrSeS monolayer at 300 K up to 8 ps. The final snapshots of these monolayers are inset.

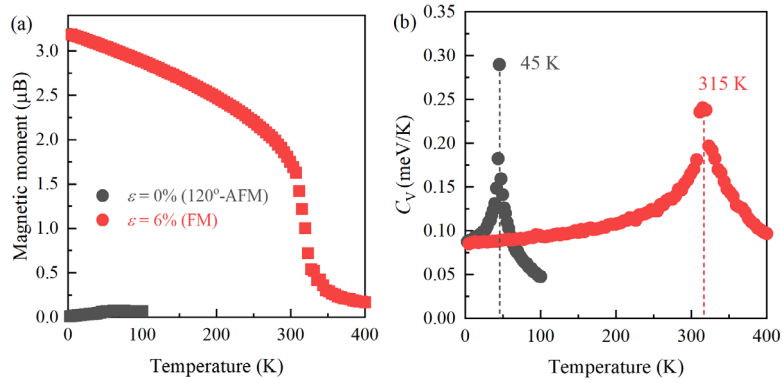

**FIG. S12** MC simulations of the (a) magnetic moments and (b) specific heats of 1T'α-CrSeS monolayer with and without in-plane tensile biaxial strain. The lines and symbols with different colors represent different strain environments.
